# Supplementary material
Source: Research Square preprint supplement (doi:10.21203/rs.3.rs-9640139/v1)
Supplement: Supplementary file 1 [file a940ec291809a680e98ac202.docx]

**Supplementary Data**

**Machine Learning-Driven Scaffold Hopping Identifies a Non-Classical GSK-3β Inhibitor with Potent Anti-Inflammatory Efficacy**

**S1 Materials and reagents**

| **Materials** | **Manufacturer** | **CAS** |
| --- | --- | --- |
| Kinase - Glo® Luminescent Kinase Assay | ProMega（USA） | V6711 |
| ADP - Glo™ Kinase Assay | ProMega（USA） | V9101 |
| GSK - 3β kinase | MCE（USA） | HY - P700591 |
| Tideglusib | MCE（USA） | HY - 14872 |
| Lithium chloride | MCE（USA） | HY-W094474 |
| GSK - 3β kinase substrate (YRRAAVPPSPSLSRHSSPHQ(pS)EDEE) | SignalChem Biotech（Canada） | G50 - 58 |
| ATP | Bioengineering and Biotechnology Co., Ltd. (Shanghai, China). | 9048 - 46 - 8 |
| Tris | Shenggong Bioengineering Co., Ltd. (Shanghai, China) | A610195 - 0005 |
| BSA | Aladdin Biochemical Technology Co., Ltd. (Shanghai, China) | B265993 |
| HCl（36~38%） | Chuandong Chemical (Group) Co., Ltd. (Chongqing, China,) |  |
| DTT | Beyotime(Shanghai, China) | ST041 |
| MgCl2 | McLean Biochemical Technology Co., Ltd. (Shanghai, China) | 7786 - 30 - 3 |
| Dimethyl sulfoxide | MCE（USA） | HY-Y0320C |
| Cell Counting Kit-8 (CCK-8) | MCE（USA） | CAS. No. AR1160 |
| Raw264.7 Mouse Mononuclear Macrophage Leukemia Cell Dedicated Culture Medium | Punose Life Technology Co., Ltd. (Wuhan, China ) | CM-1001 |
| Raw264.7 | Punose Life Technology Co., Ltd. (Wuhan, China ) | CL-0190 |
| PBS | Dingguo Changsheng Biotechnology Co., Ltd. (Beijing, China,) | BF-0011 |
| Mouse IL-6 Elisa Kit | Aimeng Youning Biotechnology Co., Ltd. (Shanghai, China,) | LV30325 |
| Mouse TNF-α Elisa Kit | Aimeng Youning Biotechnology Co., Ltd. (China, Shanghai) | LV30536 |
| Nitric Oxide (NO) Assay Kit (Rapid) | Aimeng Youning Biotechnology Co., Ltd. (Shanghai, China,) | LV200005 |

**S2 Apparatus and measurements**

| **Apparatus** | **version** | **Manufacturer** |
| --- | --- | --- |
| White opaque 96-well plate | 3912 | Corning（USA） |
| Cell scraper | WHB-G23 | Wohong Biotechnology Co., Ltd. (Shanghai, China) |
| Microplate reader | SYNERGY H1 | BioTek（USA) |
| Electric drying oven with forced convection, electrothermal blowing dry box | WGLL-230BE | Malvern（UK） |
| Thermoculturist | THZ-300 | Yiheng (Shanghai, China,) |
| Gyroscope | XW-80A | Huxi Instrument Factory (Shanghai, China,) |
| Automatic ice maker | IMP-225 | Woray Technology Co., Ltd. (Shanghai, China,) |
| Three-gas incubator | 3131 | ThermoFisher（USA） |
| Conventional centrifuge | SC - 3616 | Zhongke Zhongjia Scientific Instruments Co., Ltd.（Anhui, China） |
| ELIASA, microplate reader | DENLEY DRAGON Wellscan MK 3 | Thermo Fisher Scientific （Finland） |
| Inverted fluorescence microscope | CKX41 | Olympus（Japan ） |
| Plate washer | Wellwash 4 MK2 | Thermo Fisher Scientific （Finland） |
| Liquid dispenser | 0.1～50ml | Tomos Scientific Instruments Co., Ltd. (Shanghai, China,) |
